# Supplementary material for: Enabling effective polysulfide trapping and high sulfur loading via a pyrrole modified graphene foam host for advanced lithium–sulfur batteries
Source: Royal Society of Chemistry journal article supplement (doi:10.1039/c7ta00445a), 2017-01-01
Supplement: c7ta00445a1.pdf [file c7ta00445a1.pdf]

## Supporting Information

### **Enable Effective Polysulfide Trapping and High Sulfur Loading via Pyrrole Modified Graphene Foam Host for Advanced Lithium-Sulfur Batteries**

Kun Zhang<sup>a</sup>, Keyu Xie<sup>a,\*</sup>, Kai Yuan<sup>a</sup>, Wei Lu<sup>b</sup>, ShitianHu<sup>a</sup>, Wenfei Wei<sup>a</sup>, Maohui Bai<sup>c</sup>, Chao Shen<sup>a</sup>

E-mail: kyxie@nwpu.edu.cn

<sup>a</sup> State Key Laboratory of Solidification Processing, Center for Nano Energy Materials, Northwestern Polytechnical University and Shaanxi Joint Laboratory of Graphene (NPU), Xi'an 710072, China.

<sup>b</sup> University Research Facility in Materials Characterization and Device Fabrication, The Hong Kong Polytechnic University, Hong Kong, China.

<sup>c</sup> School of Metallurgy and Environment, Central South University, Changsha 410083, China.

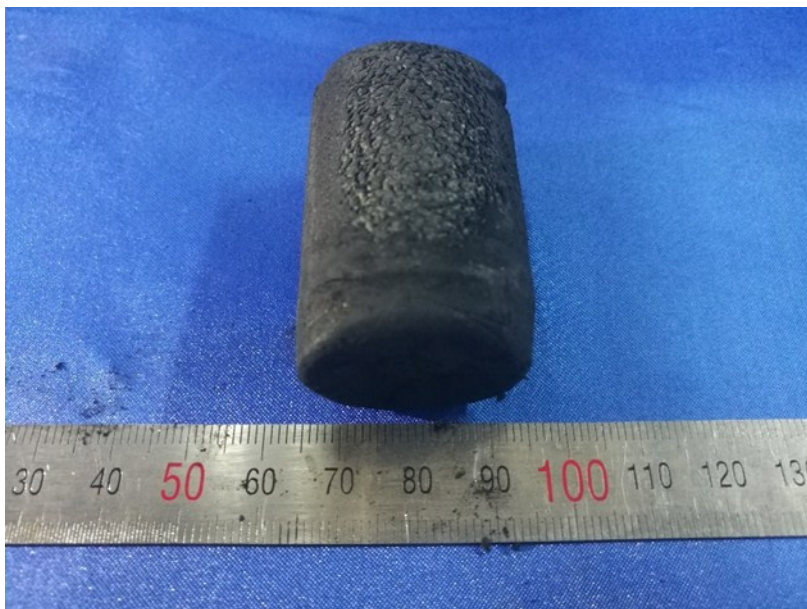

**Figure S1.** Photograph of Py-GF

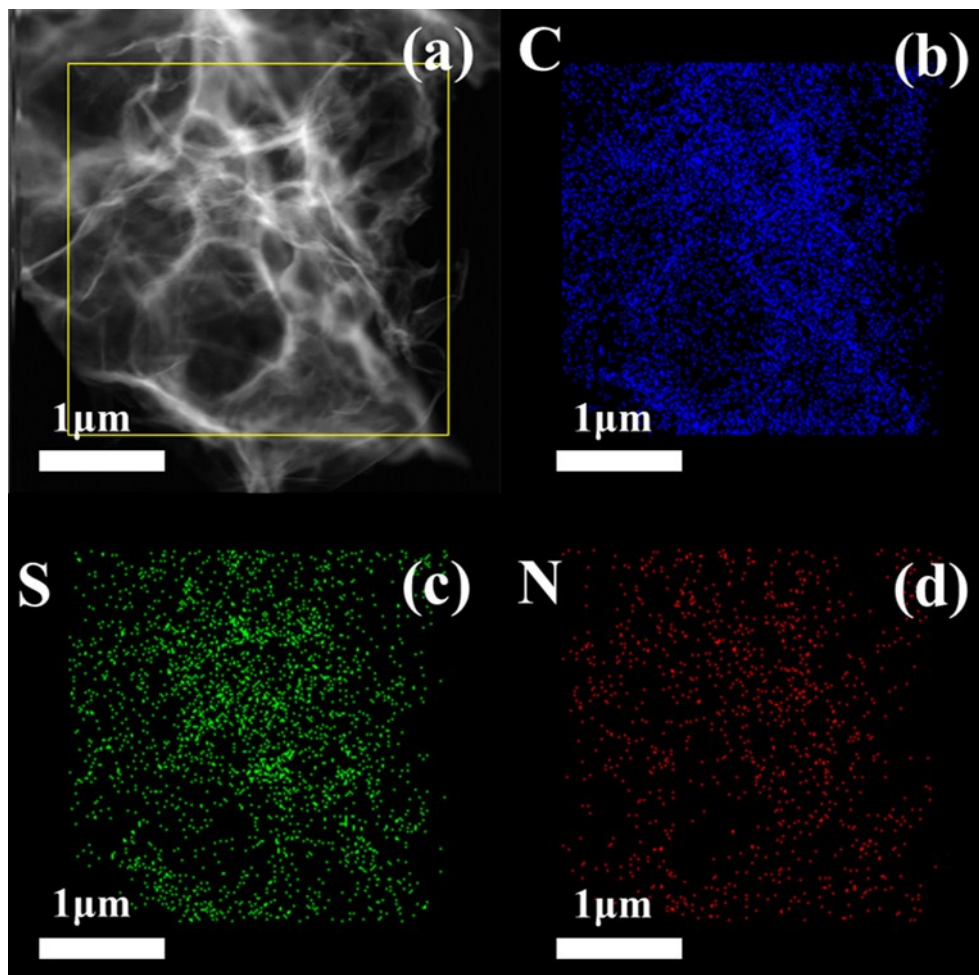

**Figure S2.** TEM images of (a) Py-GF@S cathode and the corresponding element mappings of (b) C, (c) S, (d) N.

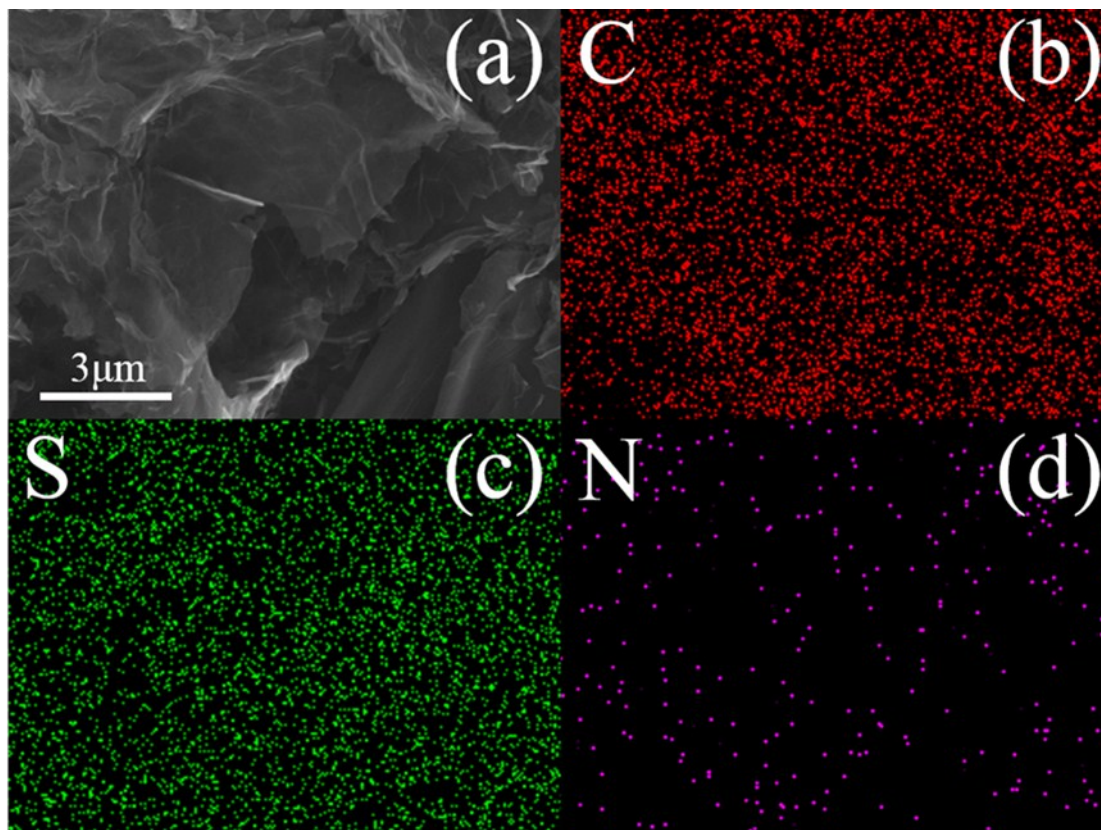

**Figure S3.** SEM images of (a) Py-GF@S cathode at 10000 times magnification and the corresponding element mappings of (b) C, (c) S, (d) N.

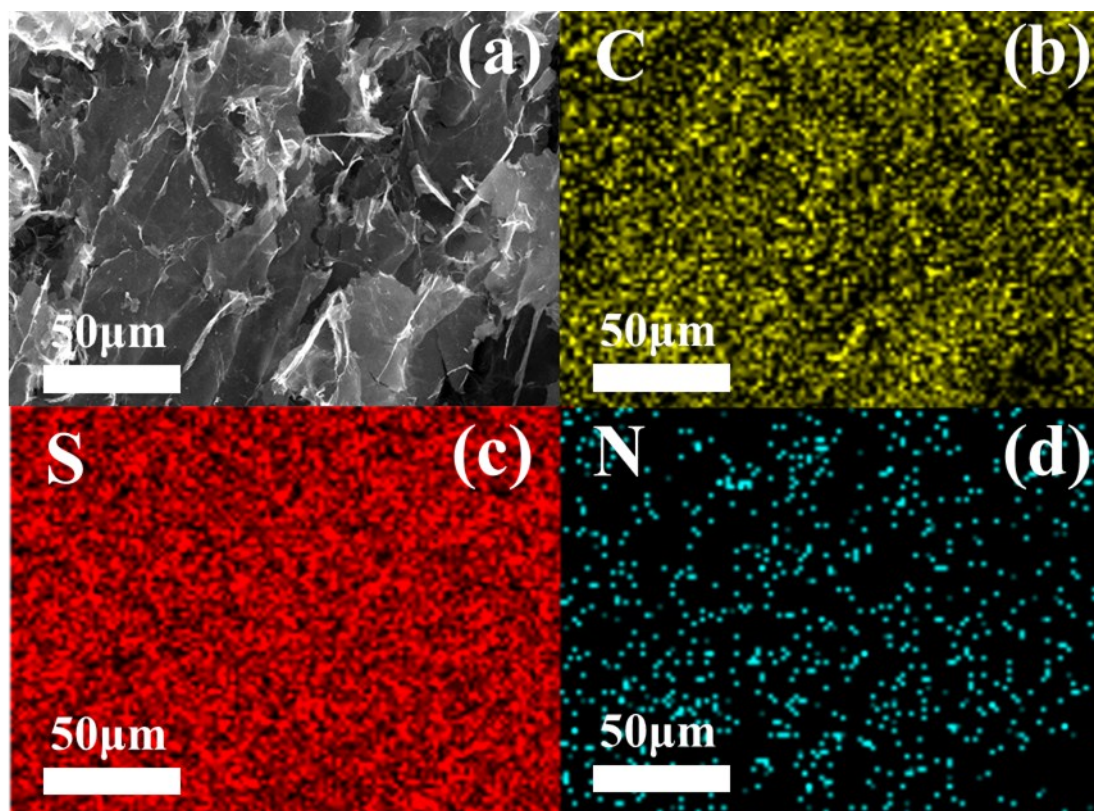

**Figure S4.** SEM images of (a) Py-GF@S cathode at 1000 times magnification and the corresponding element mappings of (b) C, (c) S, (d) N.

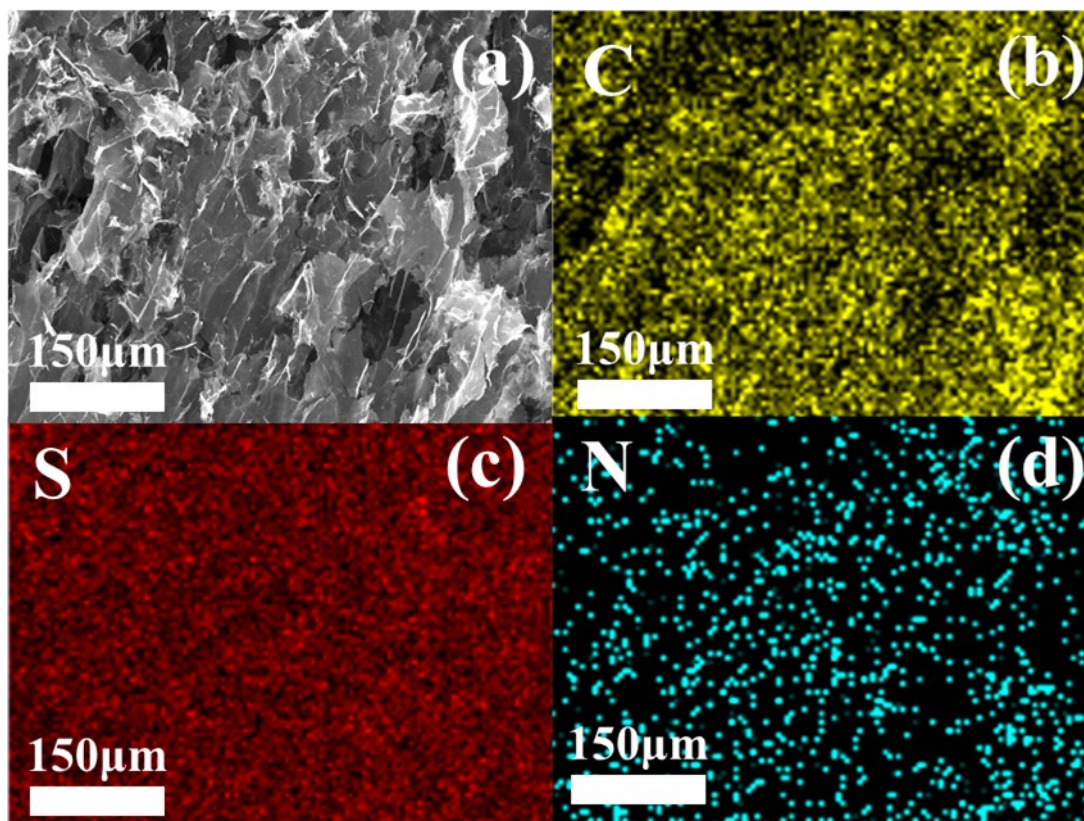

**Figure S5.** SEM images of (a) Py-GF@S cathode at 500 times magnification and the corresponding element mappings of (b) C, (c) S, (d) N.

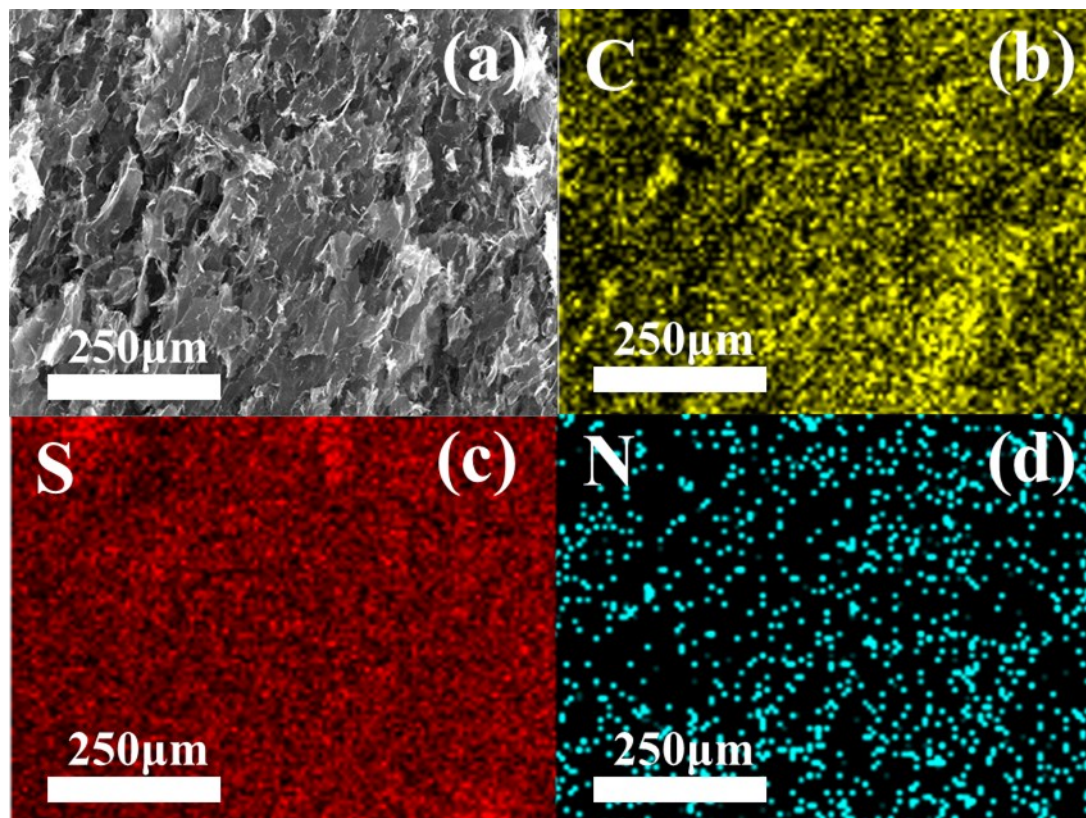

**Figure S6.** SEM images of (a) Py-GF@S cathode at 250 times magnification and the corresponding element mappings of (b) C, (c) S, (d) N.

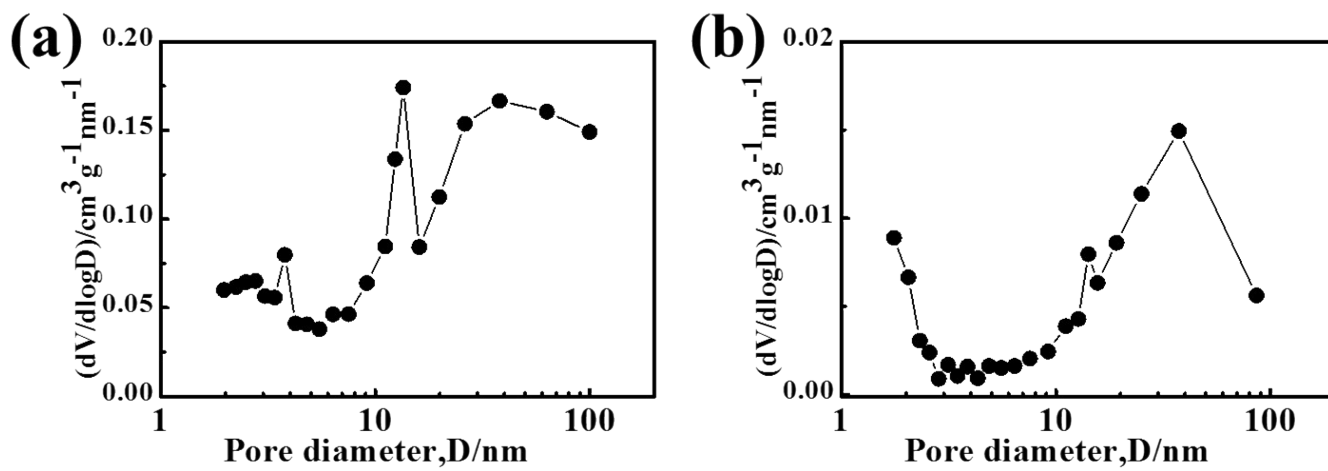

Figure S7. Pore-size-distributions of (a) Py-GF and (b) Py-GF@S.



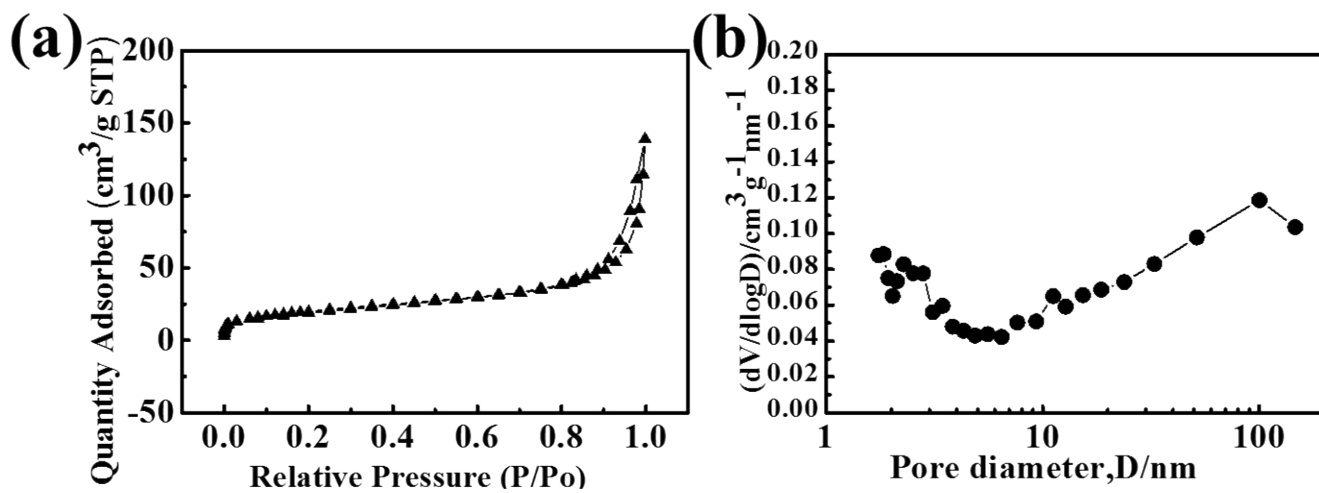

Figure S8. Nitrogen adsorption-desorption isotherms (a) and pore-size-distributions (b) of GF.

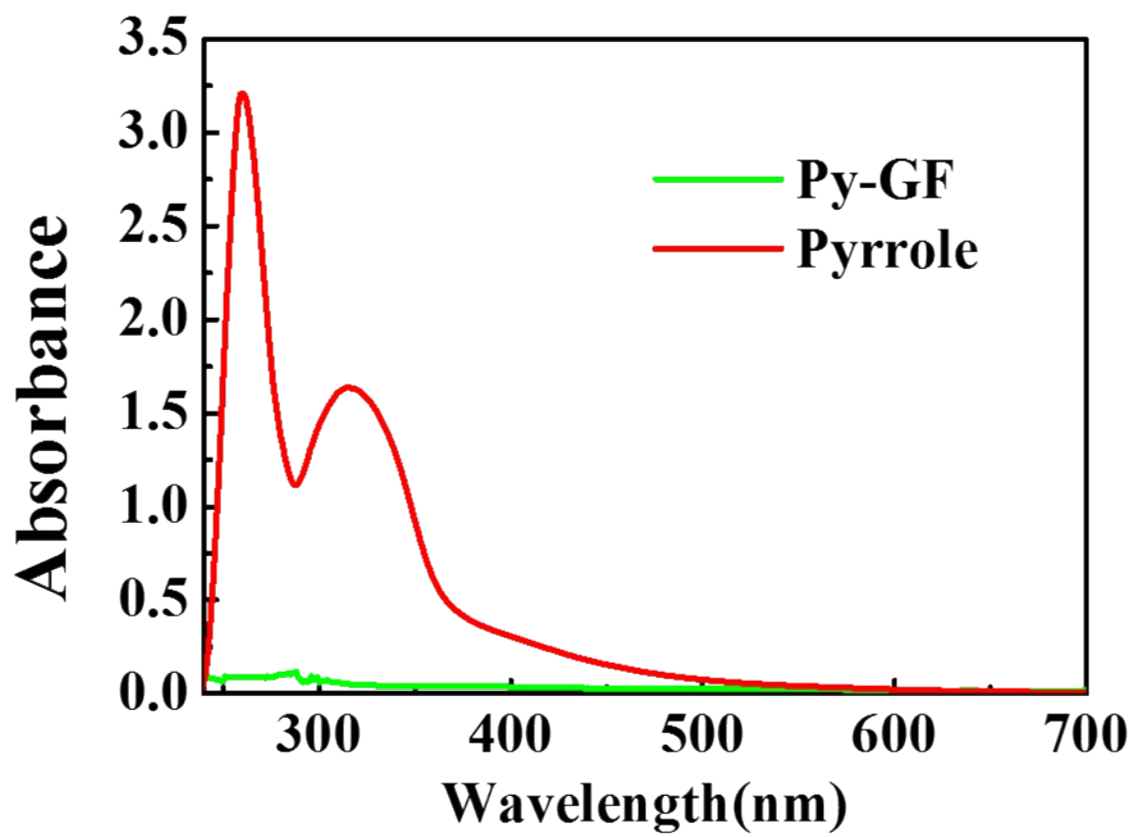

Figure S9. UV-Vis absorption spectra of pyrrole and Py-GF.

**Table S1.** Comparison with sulfur-based multi-composites integrated sulfur with both carbon materials and conductive polymers

| <b>Sample</b>                              | <b>Sulfur loading</b>    | <b>Specific capacity</b>           | <b>Capacity retention</b>                                   | <b>Ref.</b> |
|--------------------------------------------|--------------------------|------------------------------------|-------------------------------------------------------------|-------------|
| S-PPy/graphene multi-composite             | --                       | ~800 mA h g <sup>-1</sup> at 0.1C  | ~600 mA h g <sup>-1</sup> after 60 cycles (75% remained)    | 42          |
| GA/S/PPy                                   | 4 mg cm <sup>-1</sup>    | 986 mA h g <sup>-1</sup> at 0.5 C  | 687 mA h g <sup>-1</sup> after 100 cycles(69.9% remained)   | 43          |
| Polyaniline-coated sulfur/carbon composite | 0.875mg cm <sup>-1</sup> | 1405.5 m Ah g <sup>-1</sup> at 1 C | 596 m Ah g <sup>-1</sup> after 100 cycles (42.4% remained)  | 44          |
| pPAN-S/GNS                                 | 0.8 mg cm <sup>-1</sup>  | 1500 m Ah g <sup>-1</sup> at 0.1 C | ~1200 m Ah g <sup>-1</sup> after 100 cycles (80% remained)  | 45          |
| Py-GF@S                                    | 6.2 mg cm <sup>-2</sup>  | 985.8mAh g <sup>-1</sup> at 0.5 C  | 797.9 mAh g <sup>-1</sup> after 100 cycles (81.0% remained) | Our work    |

**Table S2.** Atomic percentage and weight percentage of element N and weight percentage of pyrrole in Py-GF and Py-GF@S composites.

| <b>Sample</b> | <b>N At%</b> | <b>N Wt.%</b> | <b>Pyrrole Wt.%</b> |
|---------------|--------------|---------------|---------------------|
| Py-GF         | 5.42         | 6.26          | 29.96               |
| Py-GF@S       | 2.35         | 1.09          | 5.22                |
